# Supplementary material
Source: Research Square preprint supplement (doi:10.21203/rs.3.rs-9502841/v1)
Supplement: Supplementary file 1 [file 9304b5bdf49c91171b688147.docx]

Synergistic Sequential Phosphoric Acid-Deep Eutectic Solvent Pretreatment Based Biorefinery: Selective Fractionation of Sugarcane Bagasse and Isolation of Structurally Preserved Lignin

Md. Rashed Hasana, Nigar Fatimab, Sonia Aktera, Md. Saiful Islama, Md. Farid Ahmeda, Mohammad Majedul Haquea, S. M. Asaduzzaman Sujana, Swapan Kumer Raya*

aBangladesh Council of Scientific & Industrial Research, Dhanmondi, Dhaka, Bangladesh

bNational Institute of Biotechnology, Savar, Dhaka, Bangladesh

Corresponding author’s email: swapanray_bcsir@ymail.com

*Supplementary Information*

*Table of contents*

| SN | Description | Page |
| --- | --- | --- |
| SI Section S1 | Compositional analysis of Sugarcane bagasse (SCB) | 2 |
| SI Table S1 | Amounts of structural and non-structural components of sugarcane bagasse | 2 |
| SI Section S2 | Examination of physicochemical properties of *ChCl-LA* DES system | 3 |
| SI Section S3 | Examination of physicochemical properties of *DES-lignin* and *DES-cellulose* | 4-7 |
| SI Table S2 | FT-MIR spectral data of *DES-lignin* the assignments of the bands | 8 |
| SI Table S3 | FT-NIR spectral data of *DES-lignin* the assignments of the bands | 9 |
| SI Table S4 | 1H-NMR spectral data of *DES-lignin* and the assignments of the peaks | 10 |
| SI Table S5 | 13C-NMR spectral data of *DES-lignin* and the assignments of the peaks | 11 |
| SI Table S6 | 1H-13C HSQC-NMR spectral data of *DES-lignin* and the assignments of the peaks | 12 |
| SI Table S7 | XRD analysis of commercial cellulose and *DES-cellulose* and tentative assignment of the crystalline peaks | 13 |
| References |  | 13-14 |

**SI Section S1** Compositional analysis of Sugarcane bagasse (SCB)

The collected sugarcane bagasse was prepared for compositional analysis following established standard procedures [1]. Initially, water and ethanol-soluble extractives were removed using Soxhlet extraction according to the NREL protocol NREL/TP-510-42619 [2]. The total ash content of the sample was subsequently determined by heating the sample in a furnace at 575 ± 25 °C for 4 h, following the procedure described in NREL/TP-510-42622 [3]. Klason lignin and acid-insoluble ash contents were quantified using the NREL method outlined in NREL/TP-510-42618 [4]. Holocellulose content was determined by the chlorite bleaching method in accordance with TAPPI T9 wd-75. The α-cellulose content was measured by sequential alkali treatment of the dried holocellulose with 17.5% (w/v) and 9.45% (w/v) NaOH, following TAPPI T 203 cm-09 [5]. Finally, the hemicellulose content was calculated as the difference between holocellulose and α-cellulose contents [6].

**SI Table S1** Amounts of structural and non-structural components of sugarcane bagasse

| Total extractives  (wt%) | | Ash  (wt%) | | α-cellulose  (wt%) | Hemicellulose  (wt%) | Klason lignin  (wt%) |
| --- | --- | --- | --- | --- | --- | --- |
| Water soluble extractives | Ethanol soluble extractives | Total ash | Acid insoluble ash |
| 9.23 ± 0.52 | 3.82 ± 0.19 | 1.62 ± 0.05 | 0.47 ± 0.04 | 41.19 ± 1.64 | 26.46 ± 1.04 | 20.79 ± 0.52 |

**SI Section S2***Examination of physicochemical properties of ChCl-LA DES system*

Physicochemical properties of *ChCl-LA* DESsystem were examined by different methods, e.g., moisture content, pH, density, refractive index, viscosity and thermal properties.

*Determination of pH*

pH of the DES solutions was measured by multiparameter (SensION PH31, Hach, USA) maintaining 25 oC.

*Determination of density*

Density and refractive index were measured at 25 and 30 oC by using a density module (DMA 5000M) attached with a refractive index module (Abbemet 500, Anton-paar, Austria).

*Determination of refractive index*

Density and refractive index were measured at 25 and 30 oC by using a density module (DMA 5000M) attached with a refractive index module (Abbemet 500, Anton-paar, Austria).

*Determination of viscosity*

Dynamic viscosities of the DESs were measured by a Rotational rheometer (Rheolab QC, Anton-paar, Austria). Measurement temperatures were 25, 35, 45, 55, 65, 75, 85 and 95 oC with variable shear rates from 1 to 800 s-1.

*Examination of thermal behaviors*

Simultaneous thermal analyzer (JupiterF3, Netzsch, Germany) was deployed for the investigation of thermal behaviors of the DES. This instrument is a combination of thermogravimetric analysis (TGA and DTG) and differential scanning calorimetric analysis (DSC and DDSC), where TGA and DTG is associated with mass change and DSC and DDSC deals with change in enthalpies for the transitions. A small amount of sample was kept in alumina pan and then the temperature was raised from 30 to 800 oC at a heating rate 10 oC per min in an inert environment. Thermal behaviors of the sample were evaluated from the TGA and DSC thermograms.

**SI Section S3** Examination of physicochemical properties of *DES-lignin* and *DES-cellulose*

The physicochemical properties of *DES-lignin* and *DES-cellulose* were comprehensively characterized using various instrumental techniques and detailed descriptions are provided below:

*Elemental analysis*

Elemental analysis of the *DES-lignin* was performed using an elemental analyzer (Elmentar, Germany), which quantified the carbon, hydrogen, nitrogen, and sulfur content. The oxygen content was determined by difference. For simplicity, trace amount of nitrogen were excluded, and the elemental composition, expressed as the percentages of carbon (C), hydrogen (H), and oxygen (O), was used to calculate the empirical formula based on a C9 structural unit. The methoxyl group content was estimated using an empirical correlation derived from ultimate lignin analysis through a multiple regression model, which predicts methoxyl content in the lignin macromolecule [7]and given as Equation 1.

[OCH3] = -18.5769 + 4.0658 [H] + 0.34543 [O] (1)

The empirical formulas of the alkali-lignin samples were determined by employing the guidelines and methodologies as demonstrated [8].

*Particle size analysis*

Dynamic Light Scattering (DLS) measurements were performed at 298 K using a Malvern Light Scattering Instrument (Zetasizer Nano ZS, UK) to determine the particle size of prepared *DES-lignin* and size distributions. At first, 20 mg of the sample was taken in 10 mL volumetric flask and then dimethylsulfoxide was added to make 2000 ppm (2 mg/L) stock solutions. Then, 1 mL of stock solution was transferred to 10 mL volumetric flask. 9 mL of deionized water was added and ultrasonicated for 15 min at 30 oC. No extra chemical was used to stabilize the dispersion. The sample was analyzed without applying any filtration or dialysis. The z-average size was accepted as the final hydrodynamic diameter of the *DES-lignin*.

*Scanning electron microscopic analysis*

Analysis of the particle size and surface morphology of *DES-lignin* was done by SEM (JEOL JSM-7610F, Japan) applying electron voltage 5 kV. Two drops of dispersed lignin sample (as prepared for particle size analysis) were mounted on carbon tape, dried and then sputter-coated with platinum before analysis. Observation was done with the help of charge compensator.

*Infrared spectroscopic analysis*

*Mid Infrared (FT-MIR) spectroscopic analysis*

The moisture-free *DES-lignin* was analyzed in transmission mode using a FT-MIR-NIR spectrometer (Frontier, Perkin-Elmer, UK). The spectral range was 600 to 4000 cm-1 at a spectral resolution of 4 cm-1 and number of scans was 12. About 13 mm pellets were prepared by pressing 3 mg moisture-free *DES-lignin* with 325 mg KBr. The fundamental bands were assigned accordingly.

*Near Infrared (FT-NIR) spectroscopic analysis*

The lignin sample was analyzed in diffuse reflectance mode by using Near Infrared Reflectance Accessory (NIRA) attached with a FT-MIR-NIR Spectrometer (Frontier, Perkin-Elmer, UK). The spectral range was 4,000 to 10,000 cm-1 at a spectral resolution of 16 cm-1 and numbers of scans were 32. NIR transparent glass vial was used as sample container. The overtone and combination bands of *DES-lignin* were assigned accordingly.

*Nuclear magnetic resonance spectroscopic analysis*

1H-NMR analysis was performed on *DES-lignin* by 600 MHz FT-NMR spectrometer (600 MHz, Ascend, Bruker, Germany) in *d6*-DMSO solution (25 mg sample in 0.5 mL *d6*-DMSO). Experimental temperature was 25 oC in the FT mode with the pulse width 10.5 sec (90o pulse), the data acquisition time about 5.4 s without a pulse delay, and the number of scans was 128. 13C-NMR spectrum of the sample was captured using the same solution. Number of scans was 12,000 and data acquisition time was about 12h without a pulse delay. Qualitative assessments, e.g., evaluation of aromatic proton and nature of carbon in the samples were done. Heteronuclear single quantum coherence (HSQC), i.e., 13C-1H correlation NMR spectroscopic experiment was also performed. In HSQC experiment, a 90o pulse was applied to the 1H nuclei, and a series of 13C pulses were applied to selectively excite the 13C nuclei in a one-bond coupling relationship with the 1H nuclei. Spectral acquisition time was 18h at 25 oC. The resulted cross-peaks in the HSQC-NMR spectra were examined and discussed in result and discussion section.

*Dilute solution viscometric analysis*

An automated microviscometer (Lovis 2000M, Anton-paar, Austria) was used for single-concentration intrinsic viscosity measurement of prepared *DES-lignin* sample. At first, the sample (20 mg) were dissolved in dimethyl sulfoxide (10 mL) and then ultrasonicated at 30 oC for 15 minutes. Density of DMSO was reconfirmed (1.09594 g/mL) using an automated density meter (Model: DMA 5000M; Anton-paar; Austria). Viscosity measurement was performed using a capillary, ø 1.59 steel and maintaining the temperature at 25 oC and inclination 35o with 1o steps. The automated microviscometer have the ability to measure the dynamic viscosity of solution ranging from 0.3 to 10,000 mPa.s with up to 0.5% accuracy, temperature accuracy 0.02 oC and accuracy of measuring time up to 0.05%. Billmeyer Equation 2 [9] was used to calculate approximate intrinsic viscosity of *DES-lignin* sample:

here,

= Intrinsic viscosity

*X-ray diffraction analysis of DES-cellulose*

X-ray diffraction (XRD) analysis was performed on the *DES-cellulose* and a commercial- cellulose samples under ambient temperature and pressure in the diffraction angle, 2θ ranging from 5 to 80o at a rate of 1o/min. A Rigaku X-ray Diffractometer with Ni-filtered CuKα radiation (λ = 0.1548 nm) was used at 40 kV and 40 mA. X-ray diffraction patterns were generated as a plot of intensities (counts) of the scattered x-rays at specified angles by the samples. The resulting diffraction patterns were analyzed to identify changes in peak positions, indicating modifications in the crystalline structure [10].

**SI Table S2** FT-MIR spectral data of *DES-lignin* and tentative assignment of the fundamental bands

| Observed absorption bands (cm-1) | Tentative assignment |
| --- | --- |
| 3422 | O-H stretch |
| 2938 | C-H asymmetric stretch in CH2 and CH3 groups |
| 2840 | C-H symmetric stretch in CH2 and CH3 groups/ C-H in aldehyde groups |
| 1709 and 1735 | C=O stretch in ester groups (native and/or derivatized lignins) |
| 1602 | Aromatic skeletal vibrations and C=O stretch |
| 1512 | Pure aromatic vibrations |
| 1463 | C-H deformations inCH2 and CH3 groups |
| 1425 | Aromatic vibrations combined with C-H in-plane deformations |
| 1322 | Syringyl and condensed guaiacyl units |
| 1270 | Guaiacyl units |
| 1215 | Several C-C, C-O and C=O stretches |
| 1122 | C-O deformations in secondary alcohols  Aromatic C-H in-plane deformation |
| 1030 | C-O deformations in primary alcohols  C=O stretch (unconj); Aromatic C-H in-plane deformation |
| 917 | Aromatic C-H out-of-plane  C-H out-of-plane in C-2 and C-6 syringyl units and in all the positions of the p-hydroxyphenyl units |
| 833 | C-H out-of-plane in C-2, C-6 |

**SI Table S3** FT-NIR spectral data of *DES-lignin* and tentative assignment of the overtones and conjugation bands

| Observed absorption bands (cm-1) | Tentative assignment | Reference value  (cm-1) |
| --- | --- | --- |
| 6888 | O-H stretch 1st overtone | 6913 |
| 5958 | Aromatic C-H stretch 1st overtone | 5980 |
| 5802 | Aliphatic C-H stretch 1st overtone | 5800 |
| 5210 | O-H stretching and deformation of absorbed moisture | 5202 |
| 4668 | Car-H stretching + C=C stretching | 4668 |
| 4412 | O-H stretching + C=O stretching | 4410 |
| 4200 | C-H stretching + CH2 deformation | 4283 |
| 4060 | Not assigned | 4192 |

**SI Table S4** 1H-NMR spectral data of *DES-lignin* in *d6*-DMSO solutions and tentative assignment of the peaks

| Observed 1H NMR peaks (δH/ppm) | Tentative assignment | Reference range  (δH/ppm) |
| --- | --- | --- |
| 10.036 | Protons in aldehyde units | 9.95-9.75 |
| 9.177 | Protons in cinnamaldehyde units and aromatic formate groups | 9.74-9.60 |
| 8.493-8.050 | Protons in aliphatic formate groups | 8.42-7.84 |
| 7.454 | Ethylenic and aromatic protons in p-coumaric and ferulic acids | 7.80-7.42 |
| 7.188 | Ar-H (guaiacyl units) | 7.20-6.80 |
| 6.785-6.414 | Ar-H (syringyl and condensed guaiacyl units) | 6.80-6.14 |
|  | Hα in β-O-4 units and some ethylenic protons | 6.14-5.76 |
| 5.459-5.324 | Hα in benzyl aryl ethers | 5.72-5.27 |
| 5.203-5.126 | Hβ in condensed structures | 5.25-5.00 |
| 4.929 | Hβ in β-O-4 units; Hβ in condensed structures | 4.95-4.62 |
| 4.209-4.135 | Hγ in several structures; Hα in condensed structures | 4.66-4.16 |
| 4.043-3.716 and 3.381 | Methoxyl protons | 4.12-3.33 |
| - | Aromatic acetate | 2.69-2.20 |
| 2.499 | *d6*-DMSO | 2.499 |
| 1.475-1.418 | Aliphatic acetate | 2.19-1.37 |
| 1.228 | Aliphatic Contaminants | 1.32-1.14 |
| 0.845 | Aliphatic Contaminants | 0.93-0.79 |

**SI Table S5** 13C-NMR spectral data of *DES-lignin* in *d6*-DMSO solutions and tentative assignment of the peaks

| Observed 13C NMR peaks (δC/ppm) | Tentative assignment | Reference  Range (δC/ppm) |
| --- | --- | --- |
| 174.51 | -COO-, Aliphatic ester (i.e., acetylated/lactylated γ-OH/phenolic-OH) | 171.5 |
| 166.82 | -COO-, Coumaric acid (CA) ester (i.e., esterified hydroxycinnamic acid) | 167.5 |
| 160.40 | C-4 in Coumaric acid (CA) ester (aryl ester, e.g., p-coumarate substitution) | 160.5 |
| 153.37-153.11 | C-3/C-5 in Syringyl units (etherified); C-3 in G units (C–OH or C–OCH₃) | 153.6 |
| 148.99-148.06 | C3 in G units (etherified); C4 in Syringyl or Guaiacyl units  (C–OH or C–OCH₃) | 148.2 |
| 130.81 | C1 in Syringyl or Guaiacyl units  (The linkage point for β-O-4 side chains) | 130.8 |
| 125.49 | C-5/C-5' in non-etherified 5-5 | 126.4 |
| 116.26 | C-5 in Guaiacyl units (etherified and non-etherified) | 116.6 |
| 107.23-105.42 | C-2/C-6 in Syringyl units with α-C=O | 105.0 |
| 66.23-65.97 | Cγ in β-O-4 units; β-1 structures | 63.7 |
| 56.20 | -OCH3 (Characteristic lignin methoxyl carbon (G and S units) | 56.4 |
| 40.49-39.54 | -CH3 in*d6*-DMSO | 35-22 |
| 31.78-14.36 | -CH3, in acetyl groups  (–CH₃ from acetyl/lactyl groups) (Indicates esterification via acetic/lactic acid (DES effect) | 22-18 |

**SI Table S6**  1H-13C HSQC-NMR spectral data of *DES-lignin* in *d6*-DMSO solution and tentative assignment of the cross-peaks

| Label | Observed 1H-13C HSQC-NMR cross-peaks (δC/δH in ppm) | Tentative assignment | Symbol |
| --- | --- | --- | --- |
| Bβ | 53.6/3.47 | Cβ /Hβ in β-5ʹ phenylcoumaran substructures | (B) |
|  | 55.6/3.73 | C/H in methoxyls | -OCH3 |
| Aγ | 59.4/3.40 and 3.72 | Cγ/Hγ in normal (γ-hydroxylated) β-O-4ʹ substructures | (A) |
| Iγ | 61.3/4.09 | Cγ/Hγ in cinnamyl alcohol end-groups | (I) |
| Bγ | 62.6/3.68 | Cγ/Hγ in β-5ʹ phenylcoumaran substructures | (B) |
| Aʹγ | 62.7/3.83-4.30 | Cγ/Hγ in γ-acylated β-O-4ʹ substructures | (Aʹ) |
| Iʹγ | 64.0/4.79 | Cγ/Hγ in γ-acylated cinnamyl alcohol end-groups | (Iʹ) |
| Cγ | 71.0/3.83 and 4.19 | Cγ/Hγ in β-βʹ resinol substructures | (C) |
| Aα/Aʹα | 71.8/4.87 | Cα/Hα in β-O-4ʹ substructures | (A, Aʹ) |
| S2,6 | 103.8/6.69 | C2/H2 and C6/H6 in etherified syringyl units | (S) |
| J2,6(S) | 106.8/7.06 | C2/H2 and C6/H6 in cinnamaldehyde end-groups in S unit | (J) |
| PCAβ and FAβ | 113.5/6.27 | Cβ/Hβ in p-coumarate and ferulate | (PCA) and (FA) |
| H3,5 | 114.5/6.62 | H3, C3/ C3/H3 and C5/H5 in p-hydroxyphenyl units | (H) |
| G5/G6 | 114.9/6.72 and 6.94;118.7/6.77 | G5/C5/C5/H5 and C6/C6 in guaiacyl units | (G) |
| PCA3,5 | 115.5/6.77 | C3/H3 and C5/H5 in p-coumarate | (PCA) |
| H2,6 | 128.0/7.23 | C2/H2 and C6/H6 in p-hydroxyphenyl units | (H) |
| PCA2,6 | 130.0/7.46 | C2/H2 and C6/H6 in p-coumarate | (PCA) |
| Iʹα | 132.9/6.60 | Cα/Hα in γ-acylated cinnamyl alcohol end-groups | (Iʹ) |
| PCAα and FAα | 144.4/7.41 | Cα/Hα in p-coumarate and ferulate | (PCA) and (FA) |

**SI Table S7** XRD analysis of commercial cellulose and *DES-cellulose* and tentative assignment of the crystalline peaks

| Sample | 2θ (o) | Assigned plane | Polymorph | Interpretation |
| --- | --- | --- | --- | --- |
| Commercial cellulose | 16.2 | (110) | Cellulose I | Typical cellulose Iα/Iβ crystalline reflection. |
| 23.4 | (200) | Cellulose I | Major peak of native cellulose I |
| 38.5 | (004) | Cellulose I | High-angle crystalline reflection. |
| Pretreated SCB | 12.2 | (1-10) | Cellulose II | Diagnostic of cellulose II; formed via chain reorientation during regeneration. |
| 20.3 | (110) | Cellulose II | New dominant peak; indicates antiparallel chain packing. |
| 22.1 | (020)/(200) | Mixed I and II | Shoulder peak; residual cellulose I or secondary cellulose II crystallites. |
| 37.7 | (004) | Disordered cellulose | Shifted peak indicates reduced crystallinity and smaller crystallites. |

*References*

| 1. | NREL/TP-510-42620, Preparation of Samples for Compositional Analysis, Technical Report, <https://www.nrel.gov/docs/gen/fy08/42620.pdf> (last accessed 07.08.2022) |
| --- | --- |
| 2. | NREL/TP-510-42619, Determination of Extractives in Biomass, Technical Report, <https://www.nrel.gov/docs/gen/fy08/42619.pdf> (Last accessed 07.08.2022) |
| 3. | NREL/TP-510-42622, Determination of Ash in Biomass, Technical Report, <https://www.nrel.gov/docs/gen/fy08/42622.pdf> (Last accessed 07.08.2022) |
| 4. | NREL/TP-510-42618, Determination of Structural Carbohydrates and Lignin in Biomass, Technical Report, https://www.nrel.gov/docs/gen/fy13/42618.pdf (Last accessed 07.08.2022) |
| 5. | Waliszewska, B., Grzelak, M., Gaweł, E., Spek-Dźwigała, A., Sieradzka, A. and Czekała W. (2021). Chemical Characteristics of Selected Grass Species from Polish Meadows and Their Potential Utilization for Energy Generation Purposes, *Energies,* 14(6), 1669.doi:10.3390/en14061669 |
| 6. | Ray, S. K., Bhuiyan, R. H., Muslim, T., & Ehsan, M. Q. (2024). Development of a material-driven phase III lignocellulosic feedstock biorefinery system. ACS Sustainable Resource Management, 1(9), 1994-2013. https://doi.org/10.1021/acssusresmgt.4c00168 |
| 7. | Jablonsky, M., Botkova, M. and Adamovska, J. (2015). Prediction of methoxyl groups content in lignin based on ultimate analysis. *Cellulose Chem. Technol.* 49(2), 165-168 |
| 8. | Zakis, G. F. (1994). Functional analysis of lignins and their derivatives. TAPPI PRESS, Atlanta. |
| 9. | Billmeyer Jr., F. W. (1949). Methods for estimating intrinsic viscosity. Journal of Polymer Science. 4(1), 83-86. https://doi.org/10.1002/pol.1949.120040107 |
| 10. | Park, S., Baker, J. O., Himmel, M. E., Parilla, P. A., & Johnson, D. K. (2010). Cellulose crystallinity index: measurement techniques and their impact on interpreting cellulase performance. *Biotechnology for biofuels*, *3*(1), 10. https://doi.org/10.1186/1754-6834-3-10 |
